# Supplementary material for: Effect of Repeated Plant Debris Reutilization as Organic Amendment on Greenhouse Soil Fertility
Source: MDPI journal article supplement (doi:10.3390/ijerph182111544), 2021-11-03
Supplement: s1 [file s1]

**Table S1.** PERMANOVA analysis of the fungal community in the three years of study (September-April cycles) as a function of crop nutrition.

| Global test  |          |                 | Pairwise test |             |        |
|--------------|----------|-----------------|---------------|-------------|--------|
| Sampling     | Pseudo-F | <i>p</i> -value | Treatments    | t-statistic | P(MC)  |
| Origin       | 1.6251   | 0.1147          | Test vs IF    | 1.1502      | 0.3077 |
|              |          |                 | Test vs PD    | 1.3067      | 0.2116 |
|              |          |                 | PD vs Test    | 1.3463      | 0.1976 |
| End Season 1 | 2.552    | 0.0048          | Test vs IF    | 1.1646      | 0.2644 |
|              |          |                 | Test vs PD    | 1.7549      | 0.0435 |
|              |          |                 | PD vs Test    | 1.8049      | 0.0289 |
| End Season 2 | 4.1707   | 0.0045          | Test vs IF    | 0.8631      | 0.5517 |
|              |          |                 | Test vs PD    | 2.6264      | 0.0062 |
|              |          |                 | PD vs Test    | 2.6269      | 0.0036 |
| End Season 3 | 1.081    | 0.3865          | Test vs IF    | 0.6530      | 0.6829 |
|              |          |                 | Test vs PD    | 1.1025      | 0.3253 |
|              |          |                 | PD vs Test    | 1.3161      | 0.1938 |

Inorganic fertilization (IF); tomato plant debris (PD); no fertilization (Test).

**Table S2.** Stepwise linear regression models evaluating the prediction of growth variables of tomato and cucumber seedlings grown in controlled chamber conditions.

|          | Predicted variable             | Adjusted R <sup>2</sup> | s <sup>2</sup> , df | Predictor variable            | β              | Partial t test, <i>p</i> -value |
|----------|--------------------------------|-------------------------|---------------------|-------------------------------|----------------|---------------------------------|
| Tomato   | Nº of leaves                   | 0.112                   | 0.52541, 33         | Constant                      | 4.443±0.028    | <0.001                          |
|          |                                |                         |                     | HCO <sub>3</sub> <sup>-</sup> | -0.064±0.028   | 0.028                           |
|          | Height                         | 0.202                   | 0.98328, 33         | Constant                      | 1.820±1.321    | 0.177                           |
|          |                                |                         |                     | C/N                           | 0.718±0.232    | 0.004                           |
|          | Aerial dry weight <sup>1</sup> | -                       | -                   | -                             | -              | -                               |
|          | Roots dry weight               | 0.276                   | 0.01865, 32         | Constant                      | -0.024±0.027   | 0.365                           |
|          |                                |                         |                     | C/N                           | 0.016±0.005    | 0.002                           |
|          |                                |                         |                     | Clay                          | -0.003±0.001   | 0.016                           |
|          | Leaf area                      | 0.108                   | 8.25302, 33         | Constant                      | 15.128±5.100   | 0.006                           |
|          |                                |                         |                     | Nt                            | 127.243±56.168 | 0.030                           |
| Cucumber | Nº of leaves                   | 0.343                   | 0.40582, 33         | Constant                      | 2.400±0.808    | 0.006                           |
|          |                                |                         |                     | HCO <sub>3</sub> <sup>-</sup> | -0.071±0.022   | 0.003                           |
|          |                                |                         |                     | SOM                           | 0.843±0.357    | 0.025                           |
|          |                                |                         |                     | C/N                           | 0.211±0.098    | 0.039                           |
|          | Height                         | 0.133                   | 0.38085, 33         | Constant                      | 4.213±0.007    | <0.001                          |
|          |                                |                         |                     | Silt                          | 0.018±0.007    | 0.018                           |
|          | Aerial dry weight <sup>1</sup> | -                       | -                   | -                             | -              | -                               |
|          | Roots dry weight               | 0.106                   | 0.01761, 33         | Constant                      | 0.023±0.024    | 0.338                           |
|          |                                |                         |                     | C/N                           | 0.009±0.004    | 0.031                           |
|          | Leaf area                      | 0.249                   | 12.19180, 32        | Constant                      | 77.514±16.90   | <0.001                          |
|          |                                |                         |                     | HCO <sub>3</sub> <sup>-</sup> | -1.815±0.642   | 0.008                           |
|          |                                |                         |                     | K+                            | 0.019±0.008    | 0.022                           |

<sup>1</sup>: Note that a model to predict roots dry weight of tomato seedlings could not be calculated, as none of the variables were selected during the regression

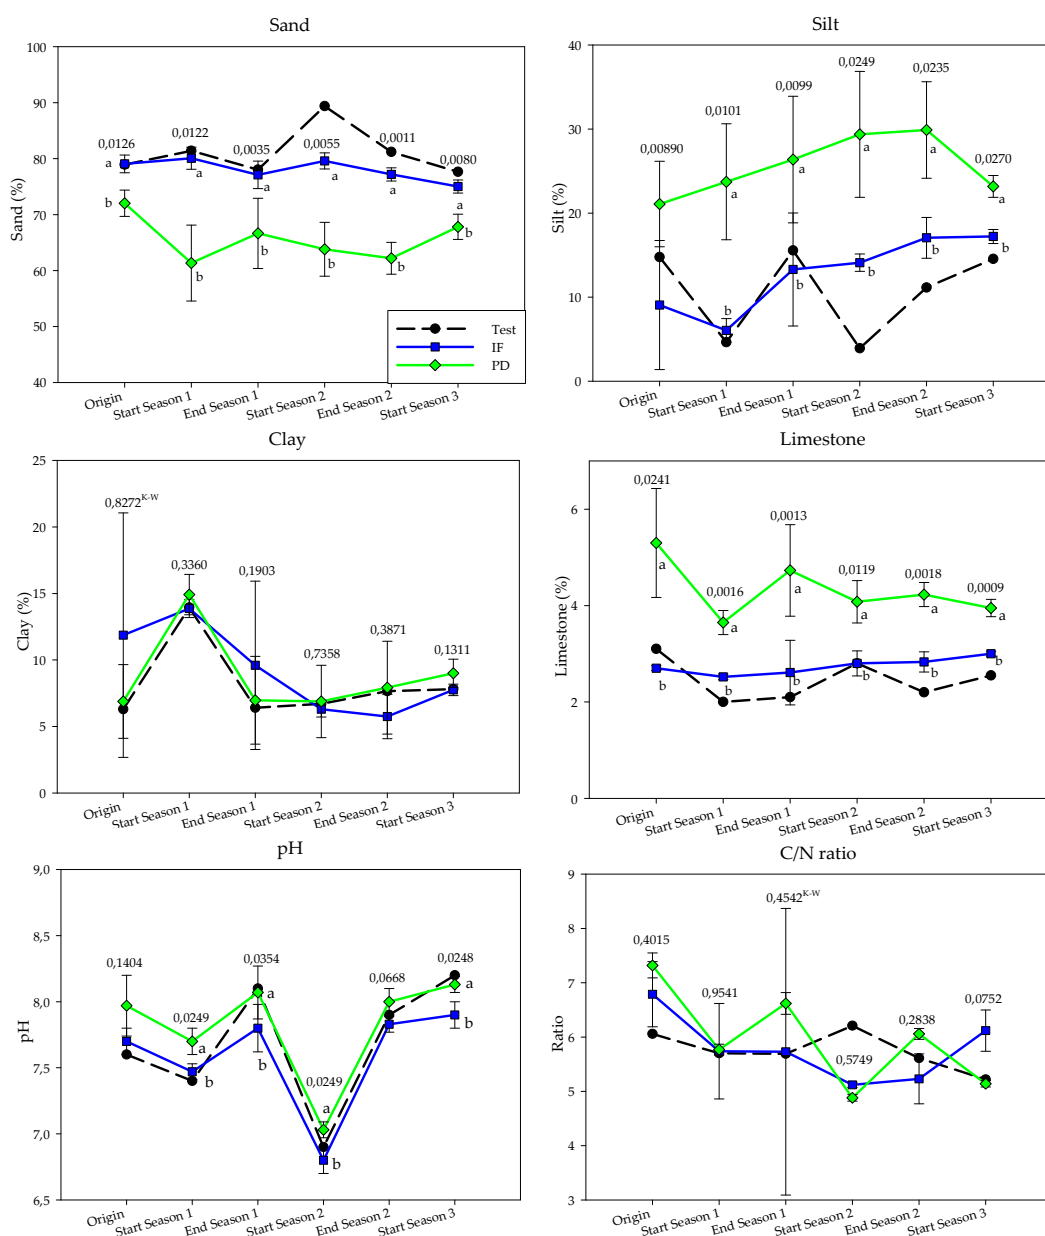

**Figure S1.** Soil physicochemical parameters in the three years of study (September-April cycles) as a function of crop nutrition. Inorganic fertilization (IF; n=3); tomato plant debris (PD; n=3); no fertilization (Test; n=1). Values (mean  $\pm$  standard deviation). Different letters indicate significant differences between IF and PD ( $p \leq 0.05$ , Student's  $t$ -test;  $K-W$ : test Kruskal-Wallis test).

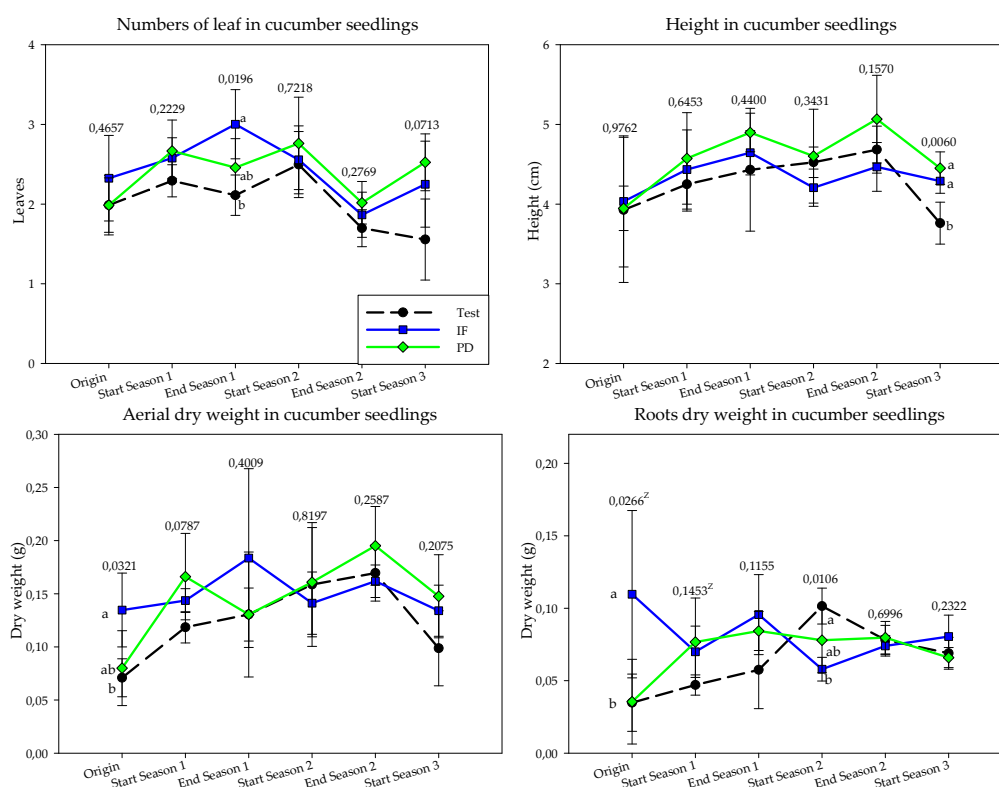

**Figure S2.** Number of leaves, height and root and aerial dry weight of cucumber seedlings grown in controlled chamber conditions in the three years of study (September-April cycles) as a function of crop nutrition. Tomato. Inorganic fertilization (IF; n=4); tomato plant debris (PD; n=4); no fertilization (Test; n=4). Values (mean  $\pm$  standard deviation). Different letters indicate significant differences ( $p \leq 0.05$ , Tukey's HDS test;  $Z: \sqrt{x}$ ).

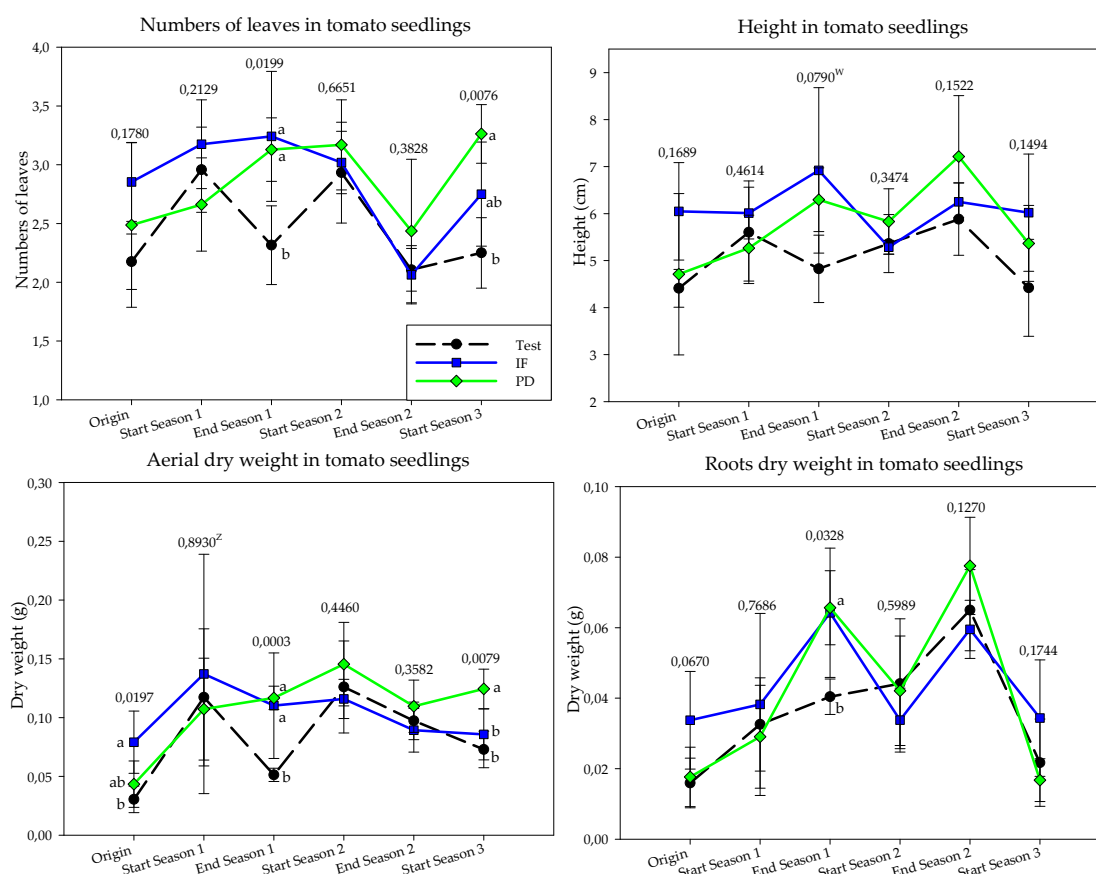

**Figure S3.** Number of leaves, height and root and aerial dry weight of tomato seedlings grown in controlled chamber conditions in the three years of study (September-April cycles) as a function of crop nutrition. Tomato. Inorganic fertilization (IF; n=4); tomato plant debris (PD; n=4); no fertilization (Test; n=4). Values (mean  $\pm$  standard deviation). Different letters indicate significant differences ( $p \leq 0.05$ , Tukey's HDS test;  $^w: \frac{1}{\log(x)}$ ;  $^z: \sqrt{x}$ ).
